# Supplementary material
Source: PubMed Central journal article supplement (PMC2929111)
Supplement: tpc.109.072520_1.pdf [file tpc.109.072520_1.pdf]

Supplemental Data. Jang et al. Plant Cell. (2010). 10.1105/tpc.109.072520

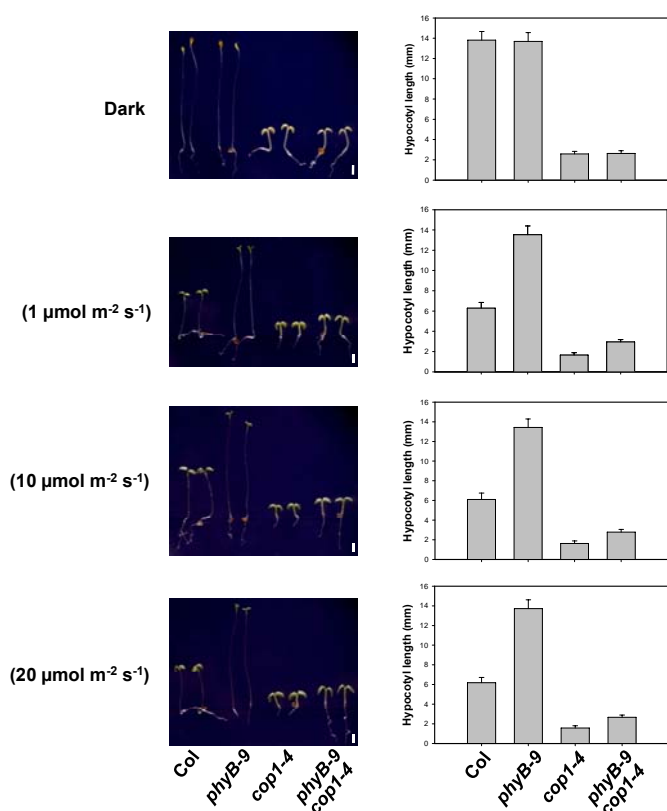

**Supplemental Figure 1.** Phenotypes of WT (Col), *phyB-9*, *cop1-4*, and *phyB-9cop1-4* under R light.

(Left panel) Four-day old seedlings grown in darkness or under R light (1, 10, and 20  $\mu\text{mol m}^{-2} \text{s}^{-1}$ ). Scale bar, 1 mm. (Right panel) data were presented as average hypocotyl length  $\pm$  standard deviation (SD;  $n > 80$ ).

Supplemental Data. Jang et al. Plant Cell. (2010). 10.1105/tpc.109.072520

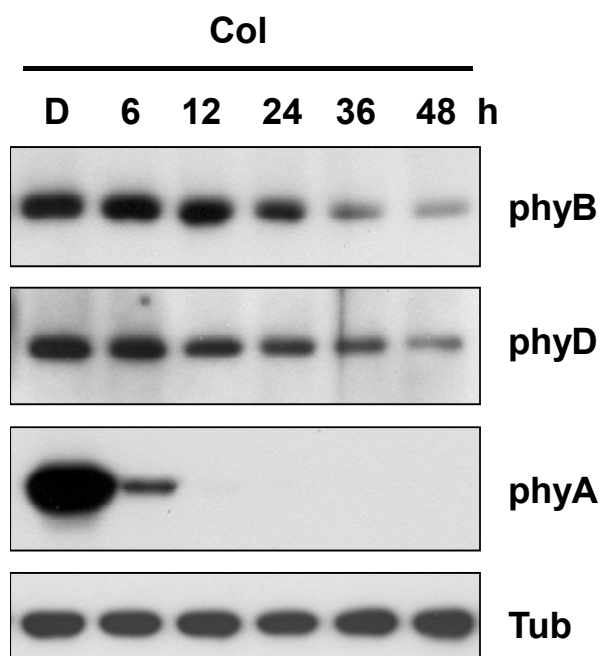

**Supplemental Figure 2.** phyA, phyB, and phyD degradation in R light.

Four-day old etiolated seedlings were exposed to R light ( $10 \mu\text{mol m}^{-2} \text{s}^{-1}$ ) for the mentioned time points. The anti-phyA monoclonal antibody was described (Shinomura et al. 1996).

Supplemental Data. Jang et al. Plant Cell. (2010). 10.1105/tpc.109.072520

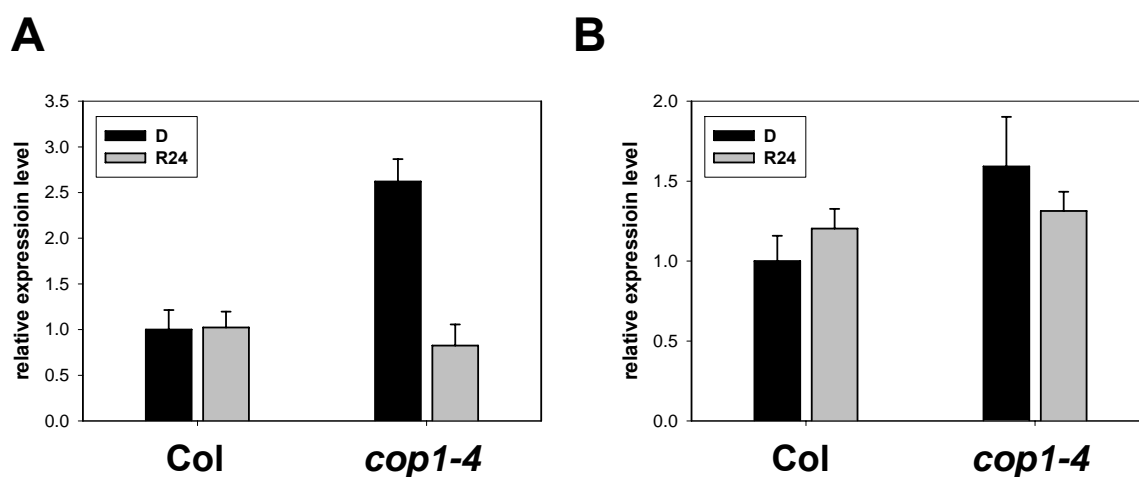

**Supplemental Figure 3.** Relative expression levels of *phyB* (A) and *phyD* (B) in *Col* and *cop1-4*.

The expression levels were measured by Q-PCR and the values were normalized using the signal from the *Actin2* gene. Four-day old etiolated seedlings (D) were exposed to R light ( $10 \mu\text{mol m}^{-2} \text{s}^{-1}$ ) for 24 h. Data show average value  $\pm$  standard deviations (SD; n=3).

Supplemental Data. Jang et al. Plant Cell. (2010). 10.1105/tpc.109.072520

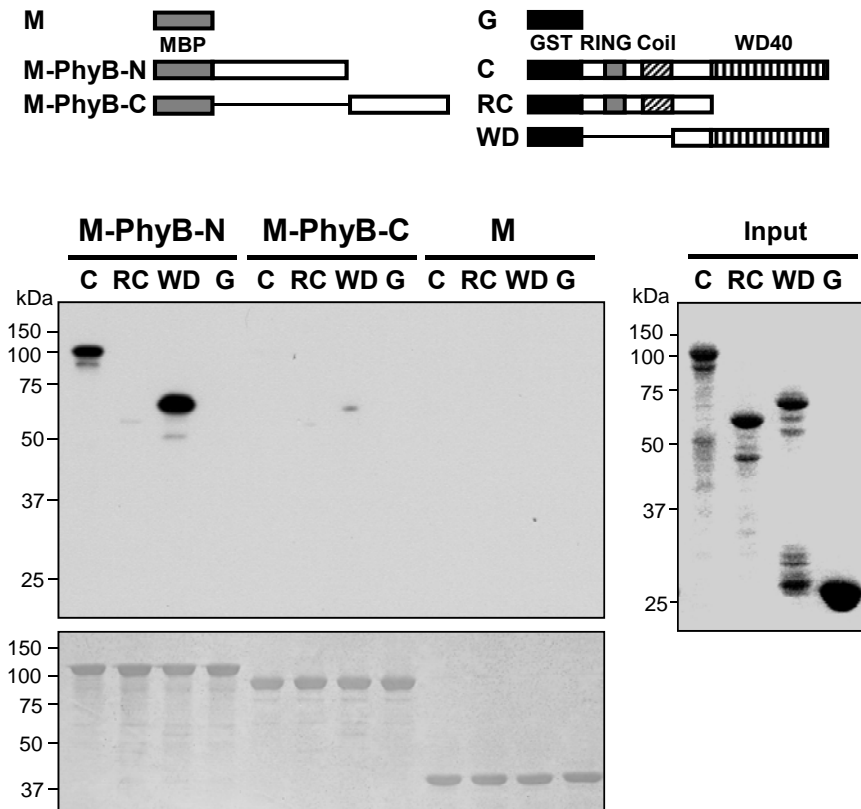

**Supplemental Figure 4.** Definition of the COP1 domain that binds to PhyB-N.

(Upper panel) Schematic diagrams of bait proteins (M-PhyB-N, M-PhyB-C, and M) and target proteins (G, GST; C, GST-COP1; RC, GST-RING+Coil; WD, GST-WD40). (Lower left) About 500 ng of target proteins were pulled-down with 1  $\mu$ g of bait proteins and detected by anti-GST antibody. Membrane staining after pull-down assay was used to monitor amounts of bait proteins. Lower right, purified target proteins used in pull-down assays (Input).

Supplemental Data. Jang et al. Plant Cell. (2010). 10.1105/tpc.109.072520

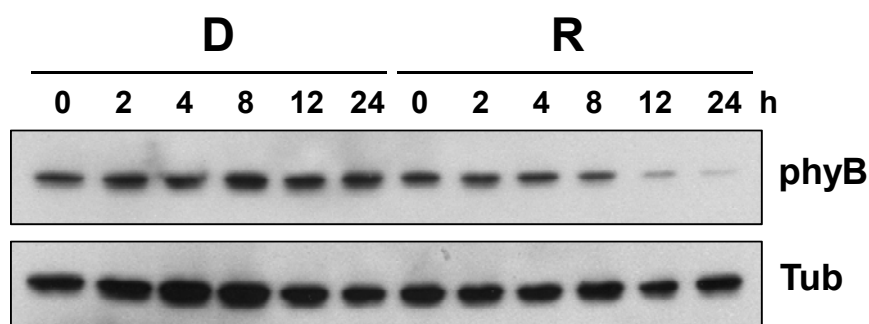

**Supplemental Figure 5.** Half life of phyB in darkness and under R light.

For protein decay experiment, four-day-old etiolated seedlings were transferred to liquid MS medium containing 100  $\mu\text{M}$  cycloheximide, kept in the dark for 30 min, and then exposed to R light ( $10 \mu\text{mol m}^{-2} \text{s}^{-1}$ ) or further incubated in the dark (D). Samples were harvested as indicated and analyzed by Western blot analysis using anti-phyB and anti-tub antibodies.

Supplemental Data. Jang et al. Plant Cell. (2010). 10.1105/tpc.109.072520

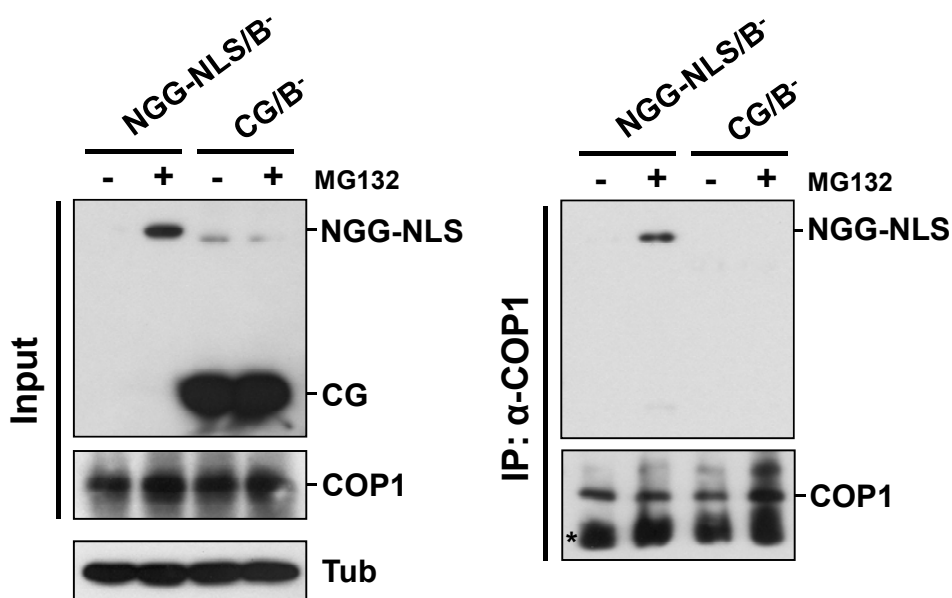

**Supplemental Figure 6.** Co-immunoprecipitation of NGG-NLS with COP1.

Protein extracts of transgenic *Arabidopsis* seedlings (NGG-NLS/B- and CG/B-) treated with or without MG132 (25  $\mu$ M) under R light (10  $\mu$ mol m<sup>-2</sup> s<sup>-1</sup>) for 12 h were immunoprecipitated with anti-COP1 antibody. Input proteins and immunoprecipitates were detected by Western blot analyses using anti-COP1 and anti-GFP antibodies. Input refers to the starting amount in extracts used for immunoprecipitation reactions. Asterisk indicates the cross-reaction with the heavy chain of the protein A-conjugated antibody.

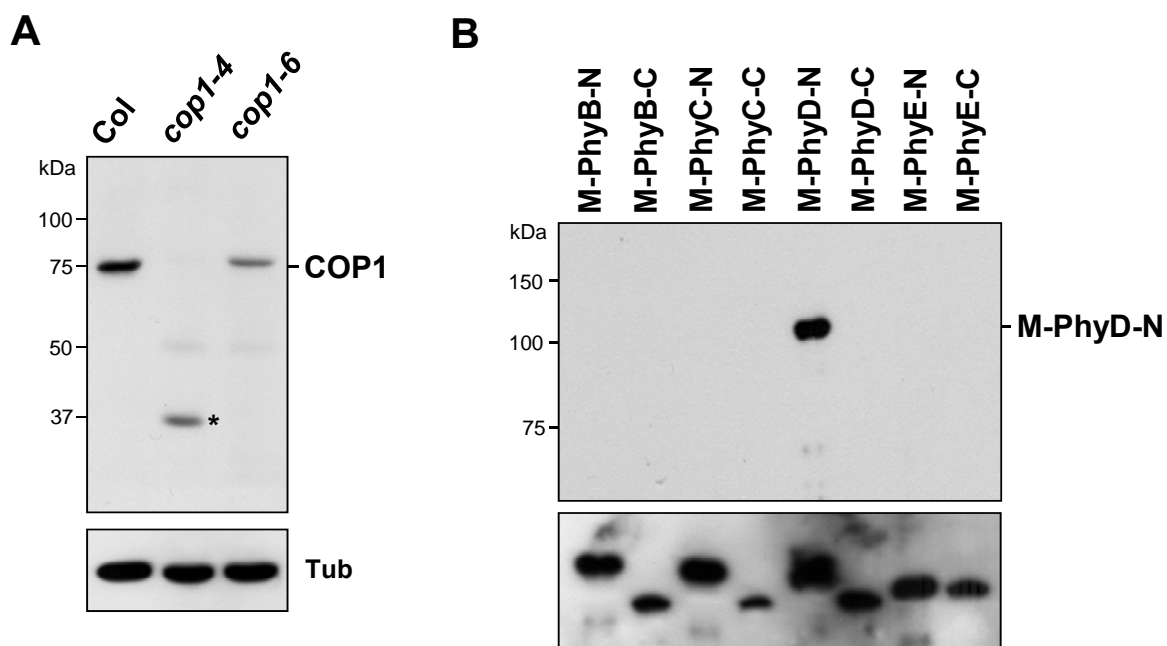

**Supplemental Figure 7.** The specificity of monoclonal anti-COP1 and polyclonal anti-phyD antibodies.

**(A)** Four-day old dark-grown seedlings (WT, *cop1-4*, and *cop1-6*) were used to detect COP1. Asterisk indicates the truncated COP1 protein (approximately 33 kDa) in *cop1-4* (McNellis et al., 1994). Note that *cop1-6* generates a protein with 5 additional amino acids (CLVLW) inserted between Glu-301 and Phe-302 of the WT COP1 (McNellis et al., 1994).

**(B)** The recombinant proteins were detected using anti-phyD (upper panel) and anti-MBP (Lower panel) antibodies.

Supplemental Data. Jang et al. Plant Cell. (2010). 10.1105/tpc.109.072520

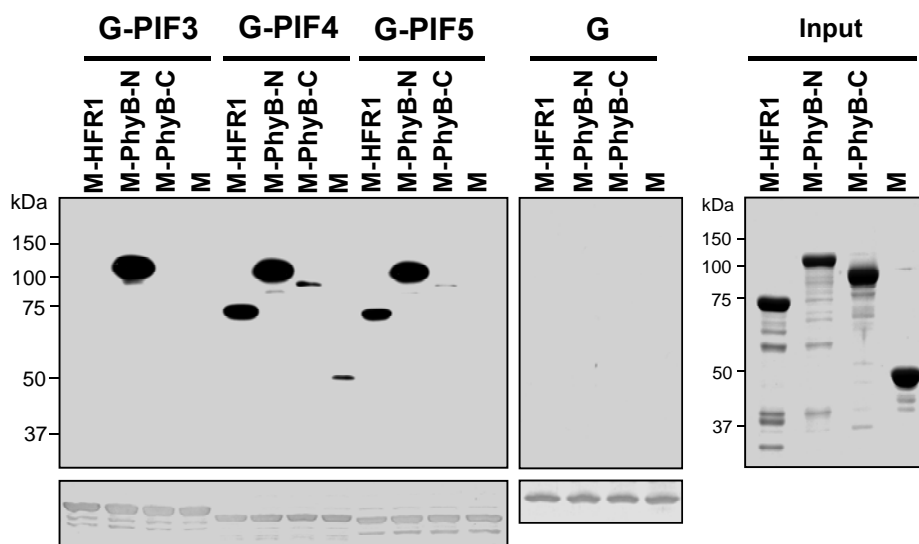

**Supplemental Figure 8.** In vitro interaction between PhyB-N and PIFs.

In vitro pull-down assays were done with 500 ng of target proteins (M-HFR1, M-PhyB-N, M-PhyB-C, and MBP) that were pulled-down with 1  $\mu$ g of bait proteins (G-PIF3, G-PIF4, G-PIF5, and GST) and detected by anti-MBP antibody. PhyB-N and PhyB-C are apoproteins. Membrane staining after pull-down assays was used to monitor amounts of bait proteins. Purified target proteins used in pull-down assay were resolved on SDS-PAGE and indicated as Input.



Supplemental Data. Jang et al. Plant Cell. (2010). 10.1105/tpc.109.072520

### Supplemental Table 1. Primer sequences for cloning

| Name              | Forward primer                     | Reverse primer                            |
|-------------------|------------------------------------|-------------------------------------------|
| PhyB-N<br>5' - 3' | caccATGGTTTCCGGAGTCGGGGGTA         | ctaCATATCCCTACATGGCTGAACCACAC             |
| PhyB-C<br>5' - 3' | caccATGGCGGGGAACAGGGGATTGATG'      | ctaATATGGCATCATCAGCATCATGTCA              |
| PhyC-N<br>5' - 3' | caccATGTCATCGAACACTTCACGAAGC       | ctaATCCACAAGTGGGACATCCACA                 |
| PhyC-C<br>5' - 3' | caccATGAATAGGGTTCAGAAGGTAGATGAA    | tcaAATCAAGGGAAATTCTGTGAGGAT               |
| PhyD-N<br>5' - 3' | aagaattcATGGTCTCCGGAGGTGGTAGCAAAAC | aatctagatcaATCATCTCCATGTGGCTGAACCGCC      |
| PhyD-C<br>5' - 3' | caccATGGTACAGCAAGGGATGCAGGAG       | TCATGAAGAGGGCATCATCATCATTAG               |
| PhyE-N<br>5' - 3' | aagaattcATGGGATTCGAGAGTTCAAGCTCAGC | aatctagatcaATCTCTTGCTACGCCATTACCAGACAAAAC |
| PhyE-C<br>5' - 3' | caccATGGCTAATGAGCTTACTTCTTTTGTG    | CTACTTTATGCTTGAACCTACCCTCTGT              |
| PIF3<br>5' - 3'   | caccATGCCTCTGTTTGAGCTTTTCAGG       | TCACGACGATCCACAAAACCTGATCAGA              |
| PIF4<br>5' - 3'   | caccATGGAACACCAAGGTTGGAGTTTGA      | CTAGTGGTCCAAACGAGAACCGTCG                 |
| PIF5<br>5' - 3'   | caccATGGAACAAGTGTGCTGATTGGA        | TCAGCCTATTTTACCCATATGAAGACT               |

\* Unmatched DNA sequences to template plasmid DNA are indicated as lowercase letters and the lined sequences in PhyB-N and PhyE-N are for the restriction enzymes, *EcoRI* and *XbaI*.

Supplemental Data. Jang et al. Plant Cell. (2010). 10.1105/tpc.109.072520

### Supplemental Table 2. Primer sequences for site-directed mutagenesis

| Name                | Primer sequence                                  |
|---------------------|--------------------------------------------------|
|                     | Forward                                          |
| PIF5<br>(E31A/G37A) | TGAATTAGTGGcGCTATTGTGGAGAGATGcTCAAGTGGTTTTACA    |
| 5'-3'               | Reverse                                          |
|                     | TGTA AAACCACTTGA gCATCTCTCCACAATAGCg CCACTAATTCA |

\* Unmatched DNA sequences to template plasmid DNA are indicated as lowercase letters.

Supplemental Data. Jang et al. Plant Cell. (2010). 10.1105/tpc.109.072520

## Supplemental References

**McNellis, T.W., von Arnim, A.G., Araki, T., Komeda, Y., Miséra, S., and Deng, X.W.** (1994). Genetic and molecular analysis of an allelic series of cop1 mutants suggests functional roles for the multiple protein domains. *Plant Cell* **6**: 487-500.

**Shinomura, T., Nagatani, A., Hanzawa, H., Kubota, M., Watanabe, M., and Furuya, M.** (1996). Action spectra for phytochrome A- and B-specific photoinduction of seed germination in *Arabidopsis thaliana*. *Proc. Natl. Acad. Sci. USA* **93**: 8129-8133.
